# Supplementary material
Source: PubMed Central journal article supplement (PMC4393456)
Supplement: AEM.00039-15_zam999116225so1.pdf [file AEM.00039-15_zam999116225so1.pdf]

Supplemental material for:

Metatranscriptomic analysis of diminutive *Thiomargarita*-like bacteria (“*Candidatus* Thiopilula spp.”) from abyssal cold seeps of the Barbados Accretionary Prism

Daniel S. Jones, Beverly E. Flood, Jake V. Bailey

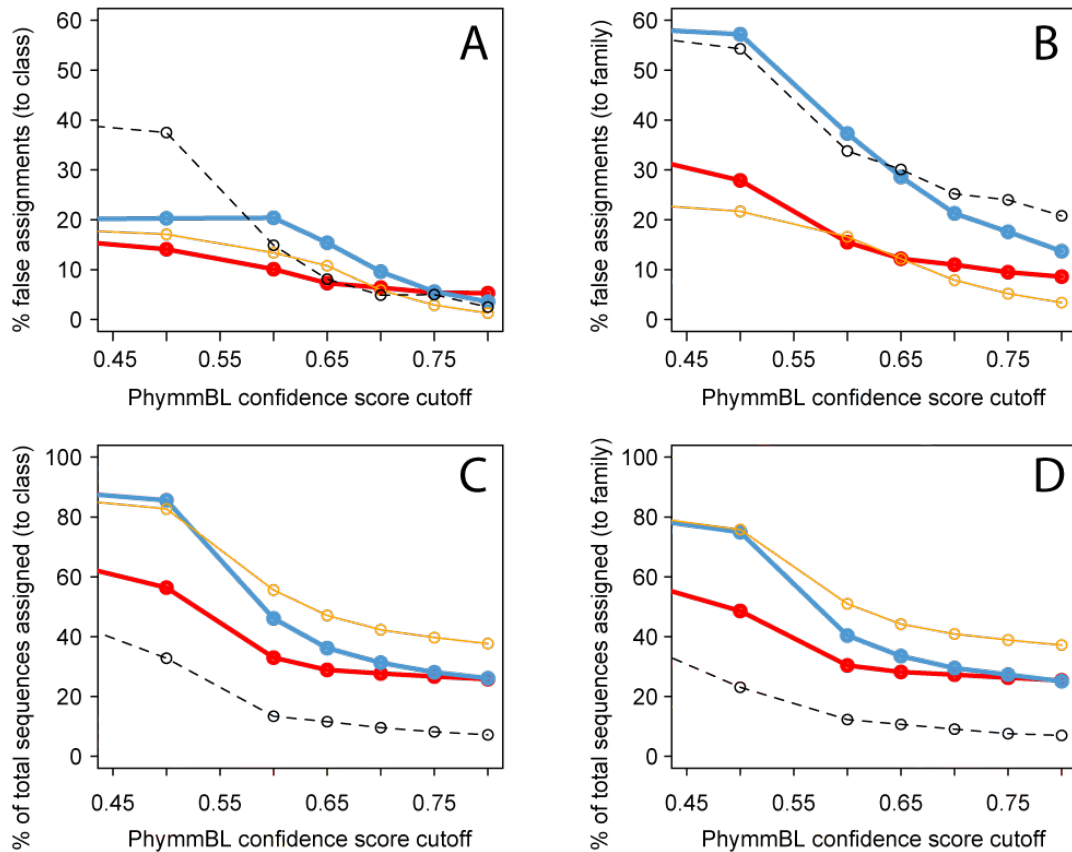

**FIG S1.** Classification of simulated genome fragments. Four draft genomes that were not present in our PhymmBL database were each fragmented into 1 kilobase-pair segments *in silico*, and each segment classified with PhymmBL. Panels A and B show the percentage of false assignments at the class and family taxonomic levels, respectively. Panels C and D show the percentage of total sequences that were assigned at the class and family levels, respectively. The three genomes in solid lines (*Photobacterium phosphoreum*, thick blue; *Acidithiobacillus thiooxidans*, thick red; and *Sulfurospirillum multivorans*, thin orange) had one other representative of their genus present in the PhymmBL database, while the black dashed line represents a genome (*Methanomicrobium mobile*) that was only represented at the family level. At the 0.65 confidence level, we observed >85% and >70% accurate assignments at the class and family levels, respectively, although <50% of total sequences could be assigned with this cutoff.

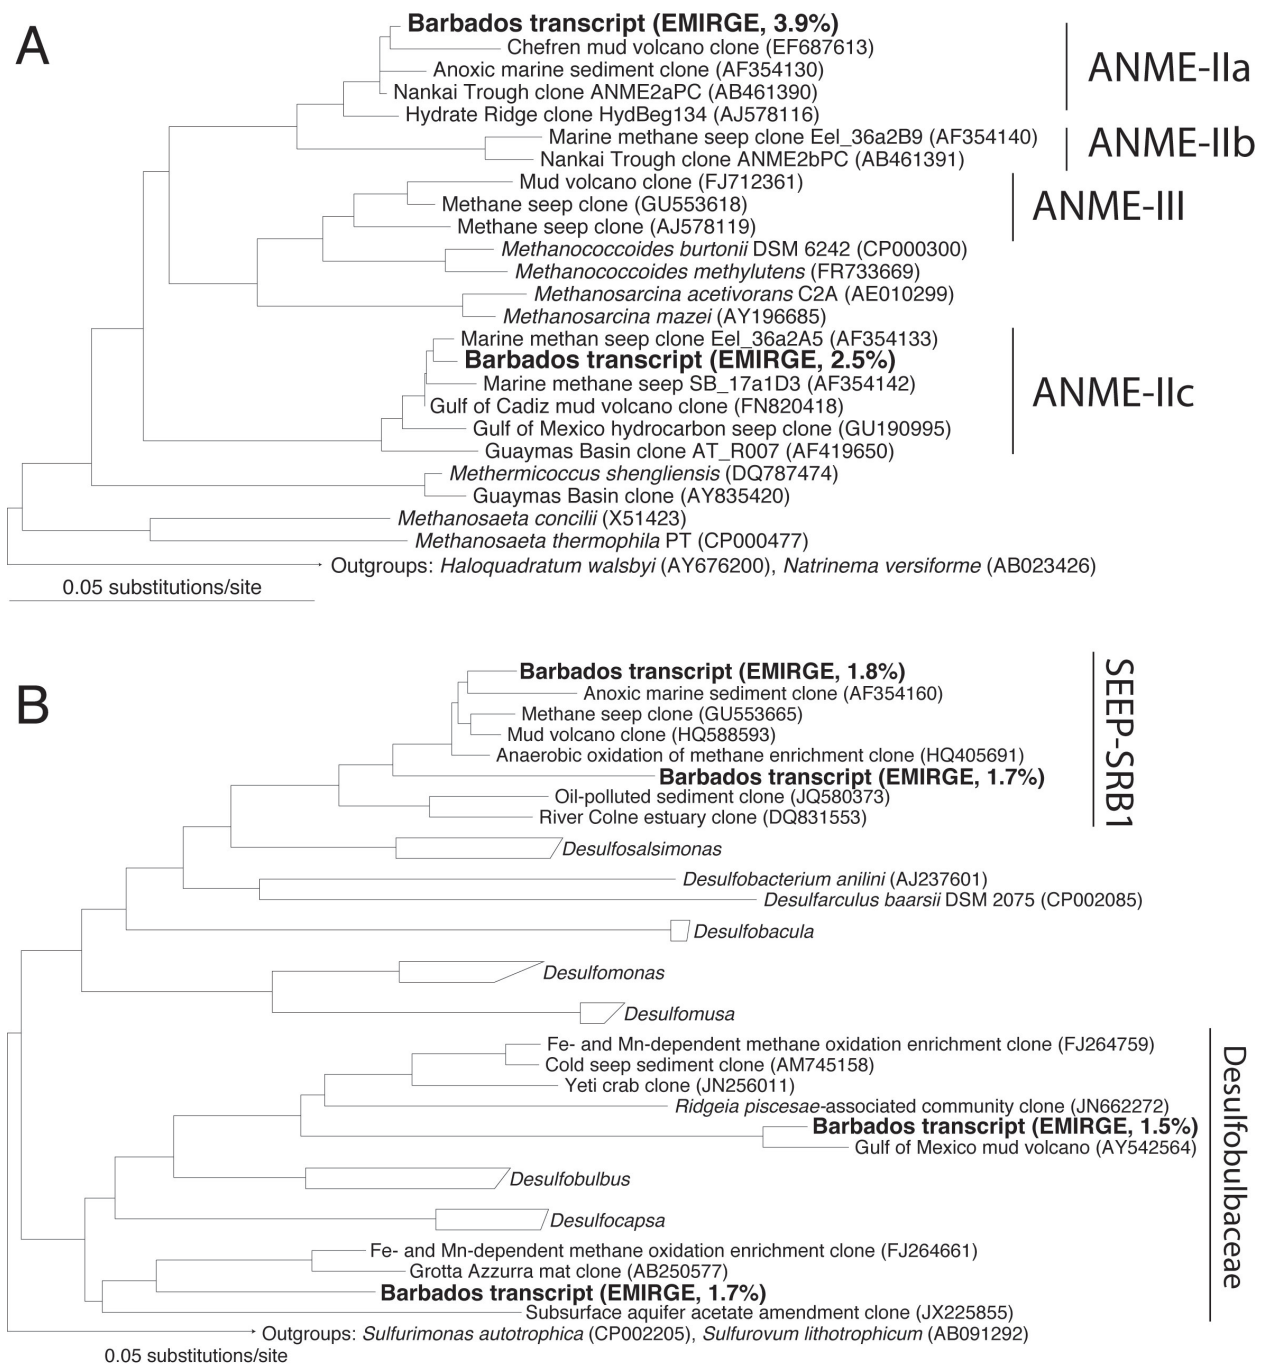

**FIG S2.** Neighbor joining trees of 16S rRNA transcripts from the Barbados metatranscriptome, assembled with EMIRGE. (a) ANME-II organisms in the *Methanomicrobia* (*Euryarchaeota*), and (b) *Deltaproteobacterial* sequences that represent >1% of rRNA transcripts in the dataset. Trees constructed using the Phylip implementation in ARB, and include the top BLAST matches to each EMIRGE contig.

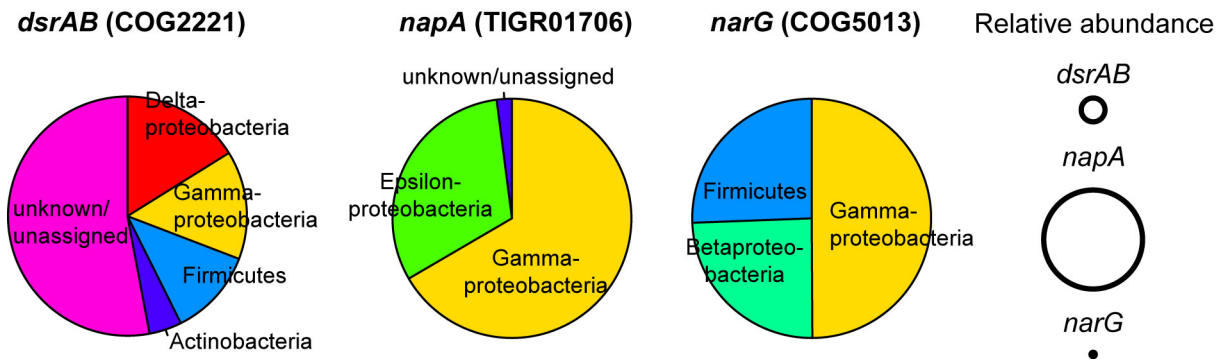

**FIG S3.** Taxonomic affiliation of genes for nitrate and sulfate reduction in the metatranscriptome: dissimilatory sulfite reductase *dsrAB*, periplasmic nitrate reductase *napA*, and membrane-bound nitrate reductase *narG*. Genes were identified in the RAMMCAP annotation using COG and TIGRfam assignments. (*napA* does not have a specific COG category but it is represented by TIGRfam TIGR01706.) Based on coverage, *napA* is 23x and 4x times more abundant than *narG* and *dsrAB* in the metatranscriptome, respectively (relative abundance, right).

**Supplemental Table S1.** Universal marker COGs used for taxonomic classification, according to Ciccarelli et al. (1)

---

| <b>COG ID</b> | <b>COG description</b>                                     |
|---------------|------------------------------------------------------------|
| COG0012       | Predicted GTPase, probable translation factor              |
| COG0016       | Phenylalanyl-tRNA synthetase alpha subunit                 |
| COG0048       | Ribosomal protein S12                                      |
| COG0049       | Ribosomal protein S7                                       |
| COG0052       | Ribosomal protein S2                                       |
| COG0080       | Ribosomal protein L11                                      |
| COG0081       | Ribosomal protein L1                                       |
| COG0085       | DNA-directed RNA polymerase, beta subunit/140 kD subunit   |
| COG0087       | Ribosomal protein L3                                       |
| COG0091       | Ribosomal protein L22                                      |
| COG0092       | Ribosomal protein S3                                       |
| COG0093       | Ribosomal protein L14                                      |
| COG0094       | Ribosomal protein L5                                       |
| COG0096       | Ribosomal protein S8                                       |
| COG0097       | Ribosomal protein L6P/L9E                                  |
| COG0098       | Ribosomal protein S5                                       |
| COG0099       | Ribosomal protein S13                                      |
| COG0100       | Ribosomal protein S11                                      |
| COG0102       | Ribosomal protein L13                                      |
| COG0103       | Ribosomal protein S9                                       |
| COG0172       | Seryl-tRNA synthetase                                      |
| COG0184       | Ribosomal protein S15P/S13E                                |
| COG0186       | Ribosomal protein S17                                      |
| COG0197       | Ribosomal protein L16/L10E                                 |
| COG0200       | Ribosomal protein L15                                      |
| COG0201       | Preprotein translocase subunit SecY                        |
| COG0202       | DNA-directed RNA polymerase, alpha subunit/40 kD subunit   |
| COG0256       | Ribosomal protein L18                                      |
| COG0495       | Leucyl-tRNA synthetase                                     |
| COG0522       | Ribosomal protein S4 and related proteins                  |
| COG0533       | Metal-dependent proteases with possible chaperone activity |

---

## **SUPPLEMENTAL REFERENCES**

1. **Ciccarelli FD, Doerks T, Von Mering C, Creevey CJ, Snel B, Bork P.** 2006. Toward automatic reconstruction of a highly resolved tree of life. *Science* **311**:1283-1287.
